# Supplementary material for: Diabetes in the older patient: heterogeneity requires individualisation of therapeutic strategies
Source: PubMed Central journal article supplement (PMC6445482; doi:10.1007/s00125-018-4547-9), 2018-02-07
Supplement: 125_2018_4547_MOESM2_ESM.pdf [file 125_2018_4547_MOESM2_ESM.pdf]

**ESM Table 1** Baseline characteristics of participants in cardiovascular outcome studies

| Variable                     | SGLT-2 inhibitors                                       |                      | GLP-1 agonists                                         |                                                                 |                                                                 |               | DPP-4 inhibitors                                          |                                           |               |
|------------------------------|---------------------------------------------------------|----------------------|--------------------------------------------------------|-----------------------------------------------------------------|-----------------------------------------------------------------|---------------|-----------------------------------------------------------|-------------------------------------------|---------------|
|                              | EMPA-REG [85]                                           | CANVAS (pooled) [89] | ELIXA [88]                                             | LEADER [87]                                                     | SUSTAIN [86]                                                    | EXSCEL [81]   | SAVOR [78]                                                | EXAMINE [79]                              | TECOS [80]    |
| Baseline                     | Empagliflozin                                           | Canagliflozin        | Lixisenatide                                           | Liraglutide                                                     | Semaglutide                                                     | Exenatide     | Saxagliptin                                               | Alogliptin                                | Sitagliptin   |
| Age (years)                  | 63.1 (63.1±8.6 for empagliflozin; 63.2±8.8 for placebo) | 63.3 (±8.3)          | 60.3 (59.9±9.7 for lixisenatide; 60.6±9.6 for placebo) | 64.3 (±7.2)                                                     | 64.6 (±7.4)                                                     | 62.0 (±6.0)   | 65.1 (65.1±8.5 for saxagliptin; 65.0±8.6 for placebo)     | 61.0                                      | 65.5 (±8.0)   |
| Duration of diabetes (years) | 12                                                      | 13.5 (±7.8)          | 9.3 (9.2±8.2 for lixisenatide, 9.4±8.3 for placebo)    | 12.9 (12.8±8.0 for liraglutide, 12.9±8.1 for placebo)           | 13.9 (±8.1)                                                     | 12.0          | 10.3 (IQR 5.2–16.7 for saxagliptin; 5.3–16.6 for placebo) | 7.2 (7.1 for alogliptin; 7.3 for placebo) | 11.6 (±8.1)   |
| BMI (kg/m <sup>2</sup> )     | 30.6                                                    | 32.0                 | 30.2                                                   | 32.5                                                            | 32.8                                                            | 32            | 31                                                        | 29                                        | 30            |
| Insulin (%)                  | 48                                                      | 50                   | 39                                                     | 45                                                              | 58                                                              | 46            | 41                                                        | 30                                        | 23            |
| HbA <sub>1c</sub> (mmol/mol) | 65.0                                                    | 66.1                 | 60.7                                                   | 71.6                                                            | 71.6                                                            | 63.9          | 63.9                                                      | 63.9                                      | 55.2          |
| HbA <sub>1c</sub> (%)        | 8.1                                                     | 8.2                  | 7.7                                                    | 8.7                                                             | 8.7                                                             | 8.0           | 8.0                                                       | 8.0                                       | 7.2           |
| Prior CVD(%)                 | 99                                                      | 66                   | 100                                                    | ~81                                                             | ~83                                                             | 73            | 79                                                        | 100                                       | 100           |
| Types of prior CVD           | MI, CHD, CVD, PVD                                       | MI, CHD, CVD, PVD    | ACS <180 days                                          | ≥50 years + CHD/CVD/PVD or CKD or ≥60 years + ≥1 CV risk factor | ≥50 years + CHD/CVD/PVD or CKD or ≥60 years + ≥1 CV risk factor | CHD, CVD, PVD | ≥40 years + CHD/CVD/PVD or ≥55/60 years + risk factors    | ACS <90 days                              | CHD, CVD, PVD |
| Hypertension (%)             | 95                                                      | 90.0                 | 76.4                                                   | 92                                                              | 92.8                                                            | 90            | 82                                                        | 83                                        | 86            |
| Follow-up (years)            | 3.1                                                     | 3.6                  | 2.1                                                    | 3.8                                                             | 2.1                                                             | 3.2           | 2.1                                                       | 1.5                                       | 3.0           |

ACS, acute coronary syndrome; CANVAS, Canagliflozin Cardiovascular Assessment Study; CV, cardiovascular; CVD, cerebrovascular disease; ELIXA, Evaluation of Lixisenatide in Acute Coronary Syndrome; EMPA-REG, Cardiovascular Outcome Event Trial in Type 2 Diabetes Mellitus; EXSCEL, Exenatide Study of Cardiovascular Event Lowering; IQR, interquartile range; LEADER, Liraglutide Effect and Action in Diabetes: Evaluation of Cardiovascular Outcome Results; MI, myocardial infarction; NR, not reported; PVD, peripheral vascular disease; SAVOR, Saxagliptin Assessment of Vascular Outcomes Recorded in Patients with Diabetes Mellitus; SUSTAIN, Trial to Evaluate Cardiovascular and Other Long-Term Outcomes with Semaglutide in Subjects with Type 2 Diabetes; TECOS, Trial Evaluating Cardiovascular Outcomes with Sitagliptin. Values provided are means ± SD unless otherwise stated.
